# Supplementary material
Source: Springer Nature journal article supplement (https://www.springermedizin.de/resource/supplementary/12913_2007_680_MOESM1_ESM.pdf/9535302)
Supplement: MOESM1 [file 9535302]

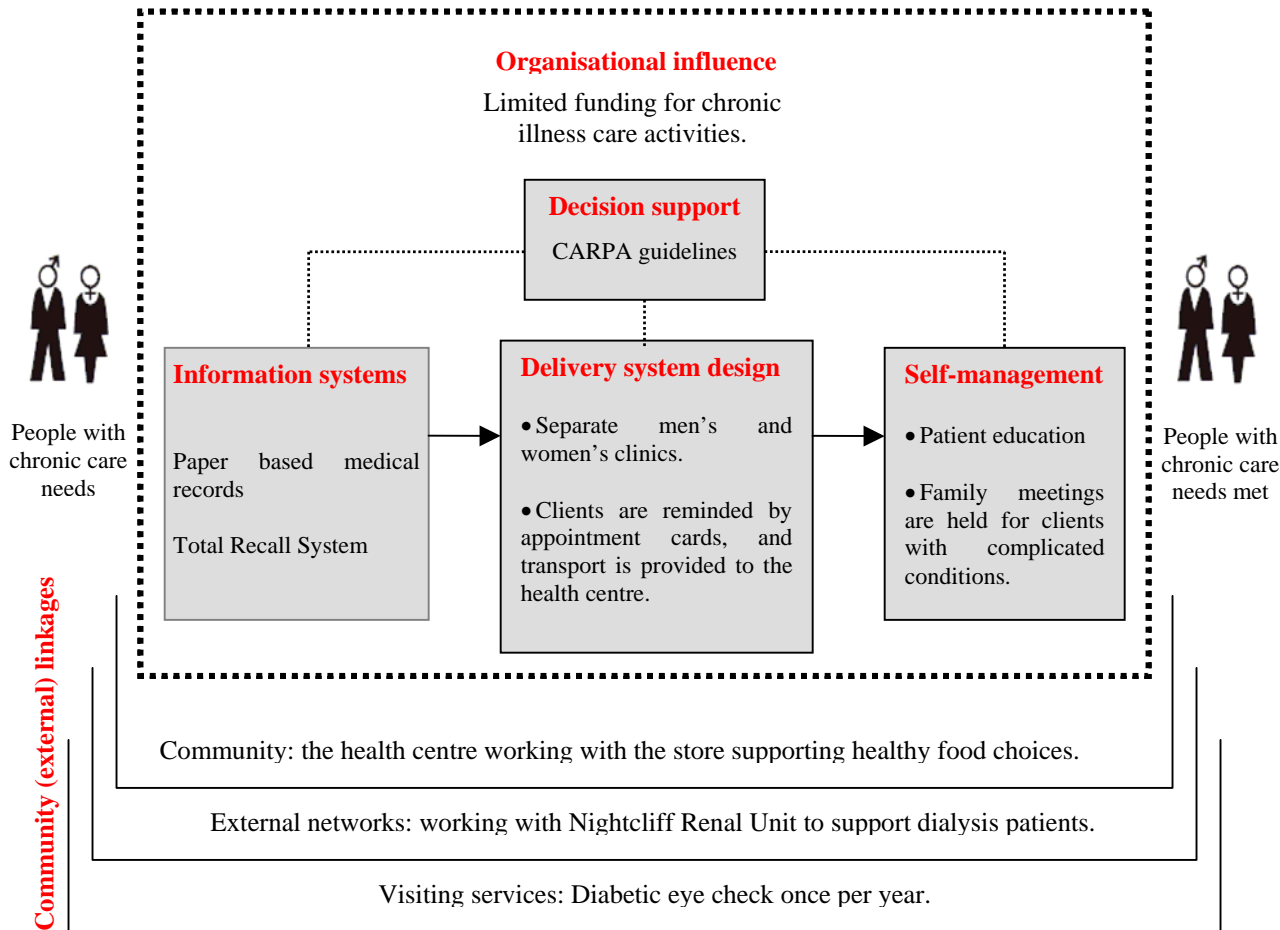

#### Staffing details

Manager, 3B nurse, female

Nurse, 3A, female

AHW, level 2, female

AHW, level 3, male

Administration officer, female

Driver, male, part time

District Medical Officer, male, visiting (1 day fortnightly)

District Medical Officer, female, visiting (1 day fortnightly)
